# Supplementary material for: Photophysical properties of an unusual bichromophoric species constructed from a cyclometalated Pt(ii) chromophore and a blue Bodipy-acetylacetonate species
Source: Royal Society of Chemistry journal article supplement (doi:10.1039/c4dt01127a), 2014-01-01
Supplement: c4dt01127a1.pdf [file c4dt01127a1.pdf]

## SUPPLEMENTARY INFORMATION

### Photophysical properties of an unusual bichromophoric species constructed from a cyclometalated Pt(II) chromophore and a blue Bodipy-acetylacetonate species

Francesco Nastasi, Fausto Puntoriero, Scolastica Serroni, Sebastiano Campagna, Jean-Hubert Olivier and Raymond Ziessel.

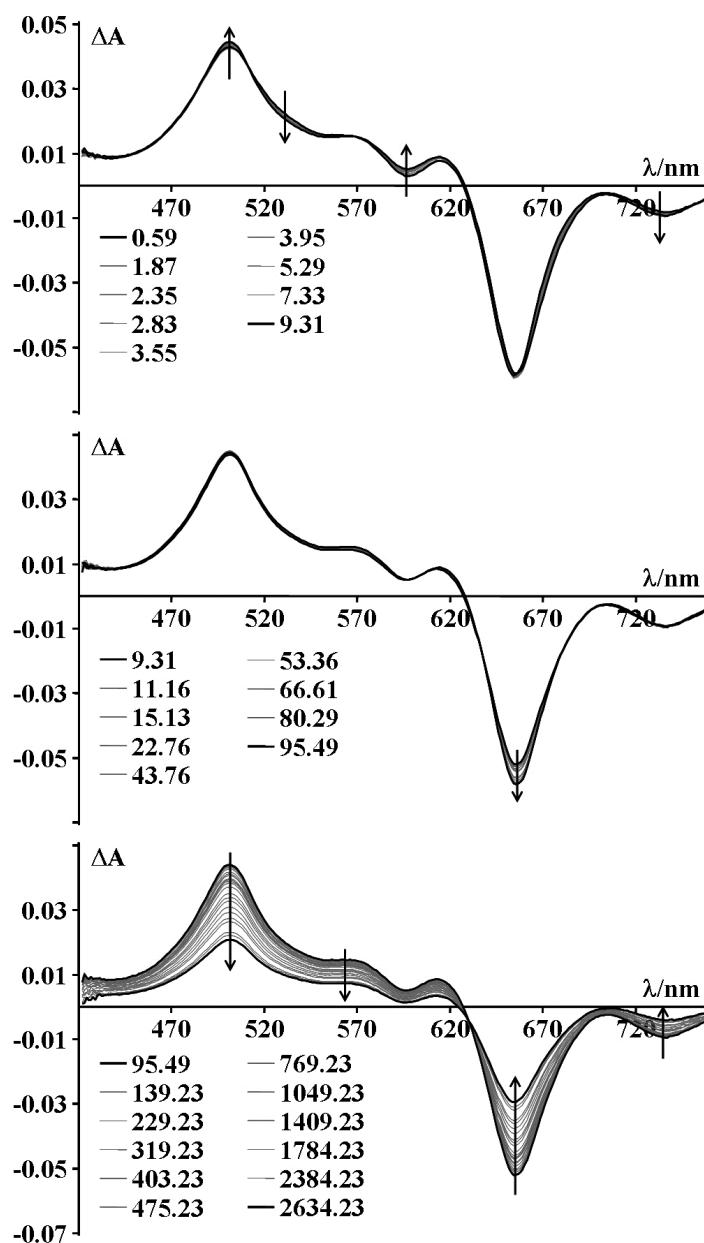

**Figure S1.** Transient absorption spectrum of **1** in toluene. Excitation wavelength, 400 nm; time delays, in ps, are shown in the panels. Absorbance at the excitation wavelength, 0.3.

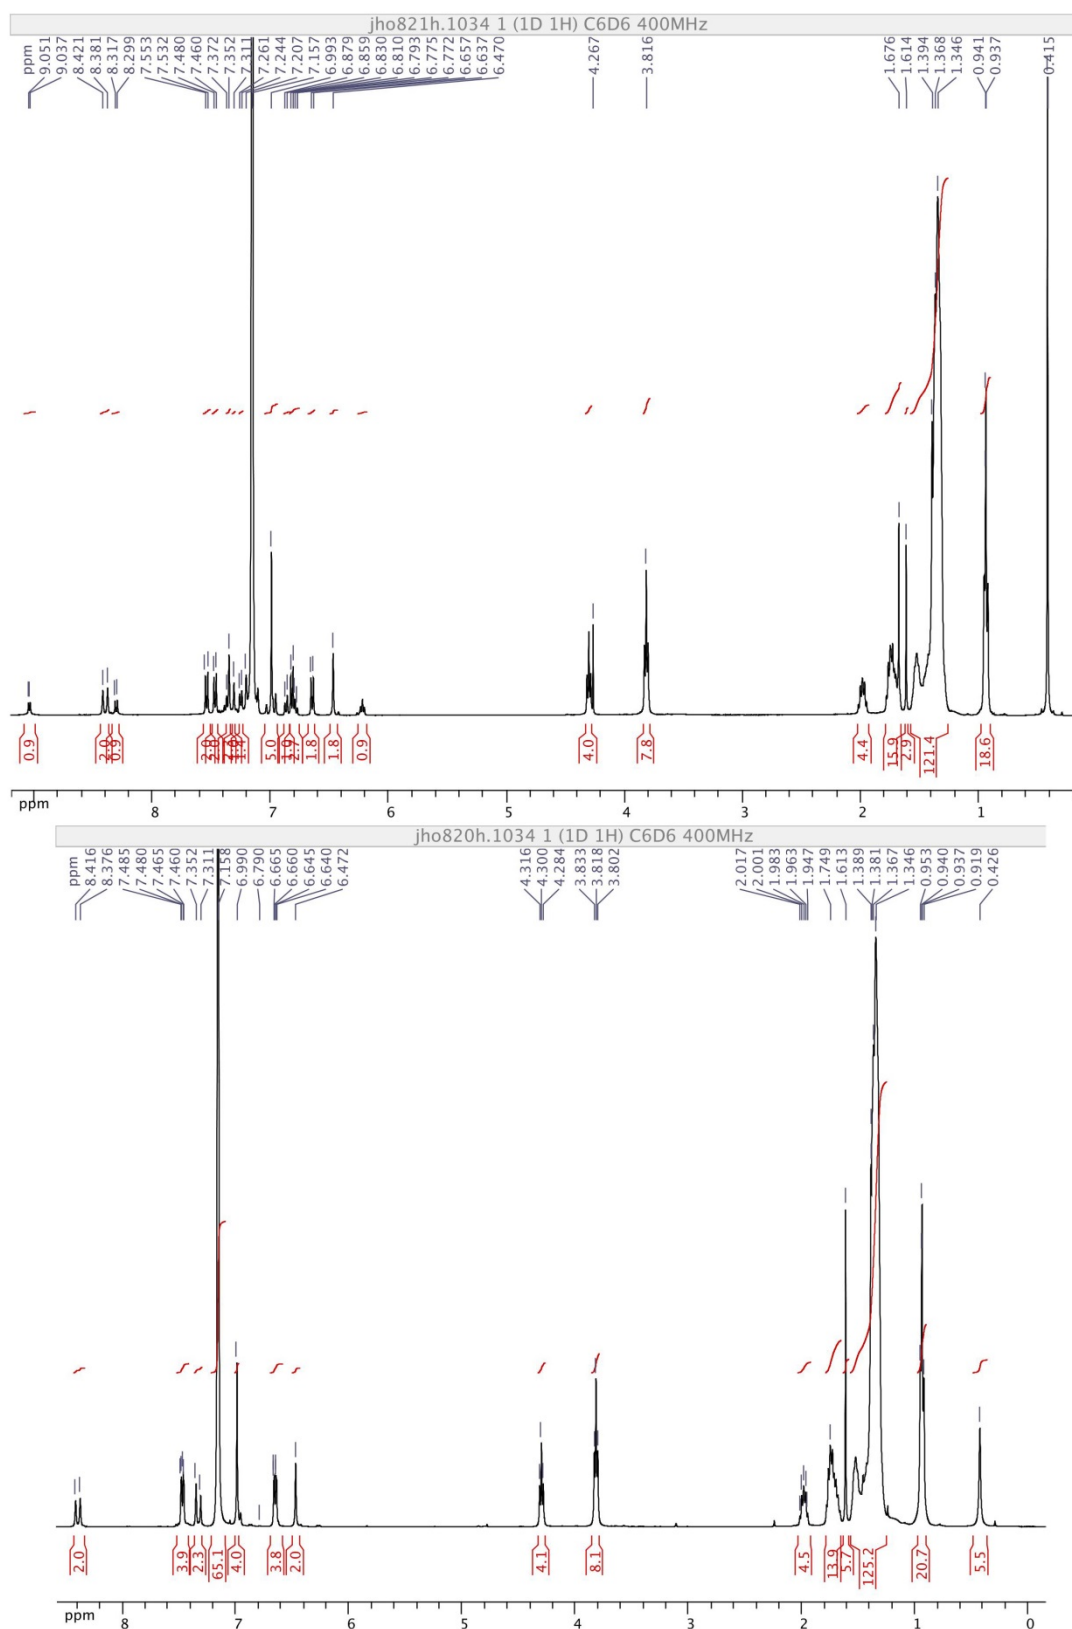

Figure S2. NMR spectra of compounds 3 and 1.
